# Supplementary material for: Penumbra-targeted CircOGDH siRNA-loaded nanoparticles alleviate neuronal apoptosis in focal brain ischaemia
Source: HighWire-hosted journal article supplement (doi:10.1136/svn-2022-002009), 2023-06-16
Supplement: svn-2022-002009supp001_data_supplement.pdf [file svn-2022-002009supp001_data_supplement.pdf]

1 **Supplementary file**

2 **Penumbra-Targeted CircOGDH siRNA-Loaded Nanoparticles Alleviate Neuronal Apoptosis**

3 **in Focal Brain Ischemia**

4

5 **Materials and methods**

6 **Materials**

7 PLGA-COOH (LA: GA = 50: 50, Mn =13000) was assembled, Polyamide amine (PAMAM)  
8 generation five and Tween 80 were purchased from Sigma-Aldrich (St. Louis, MO, USA).  
9 CY5.5-NHS was purchased from RuixiBio (Xi-an, China, catalog #: R-FR-005). The water used  
10 in all experiments was distilled water (DW). The primer sequences of CircOGDH and  $\beta$ -actin  
11 were as followed: CircOGDH Forward: AACTCGTGGAGGACCACTTG, Reverse:  
12 GAGCTTCGACTCAGGGAAAG,  $\beta$ -actin Forward: ACGGCCAGGTCATCACTATTG, Reverse:  
13 CAAGAAGGAAGGCTGGAAAAGA.

14

15 **Assembly of PLGA–PAMAM@ CircOGDH siRNA nanoparticles**

16 PLGA–PAMAM was assembled as following: 21mg of PLGA-COOH were dissolved in 3 mL of  
17 acetone, the mixed solution then was stirred at room temperature until PLGA-COOH completely  
18 dissolved. 45mg of Tween 80 were dissolved in 5 mL of DW, then the dissolved PLGA-COOH  
19 mixed solution was added dropwise under stirring overnight at room temperature. PAMAM  
20 solution (generation 5, Sigma-Aldrich, St. Louis, USA, catalog #:163442-68-0) was added to the  
21 PLGA-COOH reaction mixed solution under stirring for 12 hours at room temperature. The final  
22 product PLGA–PAMAM nanoparticles were isolated by ultrafiltration using 100k MWCO  
23 centrifugal filter (Millipore, USA, catalog #: UFC901096).

24

25 CircOGDH siRNA or CY3 labeled CircOGDH siRNA (Gene Pharma, Shanghai, China) was  
26 dissolved in 500  $\mu$ L of DW, then CircOGDH siRNA solution was added dropwise into PLGA–  
27 PAMAM mixed solution under stirring overnight at 4°C. The sequences of CircOGDH siRNA  
28 were as followed: 5' to 3' CACAGACAAACUUGUCAUGTT.

29

30 **Characterization of PLGA–PAMAM@ CircOGDH siRNA nanoparticles**

31 The zeta potential, size distribution and morphology of PLGA–PAMAM, PLGA–PAMAM@  
32 CircOGDH siRNA were characterized by Zetasizer Nano ZS particle analyzer (Malvern, England)  
33 and transmission electron microscope (TEM, Hitachi H-7650, 100 kV). TEM samples were  
34 prepared by dispersing nanoparticles on copper grids. Elemental mapping of PLGA–PAMAM@  
35 CircOGDH siRNA nanoparticles were obtained using high-resolution transmission electron  
36 microscopy (HR-TEM, JEM 2100F). The spectroscopic analysis of PLGA–PAMAM@  
37 cy3-CircOGDH siRNA nanoparticles used UV spectrophotometry (UH 4150 Spectrophotometer,  
38 Hitachi).

39

40 **Determination of siRNA complexation by gel electrophoresis assay**

41 The encapsulation degree between CircOGDH siRNA and PLGA–PAMAM nanoparticles was  
42 evaluated by agarose gel electrophoresis assays using 1.5% agarose gel electrophoresis at 120 V  
43 for 20 min. Images was obtained using an ImageQuant LAS 500 Gel analyzer (USA).

44 Quick-Load® 1000 bp DNA Ladder (New England BioLabs, USA, catalog #: NO467S) was used  
45 as a DNA marker.

46

#### 47 **Animals**

48 A total of 176 adult male BALB/c mice (22.0-25.5 g, 5 to 7 weeks) were purchased from the  
49 Institute of Laboratory Animal Science of the Chinese Academy of Medical Sciences (Guangzhou,  
50 China). Mice were housed in a strict constant temperature and humidity. Food and water were  
51 available all day and night. The study was carried out in accordance with the recommendations of  
52 the NIH Guide (NIH Publications No. 8023, revised 1978) for the Care and Use of Laboratory  
53 Animals. All experiments were carefully conducted in accordance with the guidelines for Animal  
54 Experimentation of Jinan University. The protocol was approved by the Ethics Committee of the  
55 Institute of Laboratory Animal Science of Jinan University.

56

#### 57 **Middle cerebral artery occlusion reperfusion (MCAO/R) and cerebral blood flow (CBF)** 58 **measurement**

59 Adult BALB/c mice were anesthetized with isoflurane (4% for initiating anesthesia in a chamber  
60 and 1.5% for maintaining anesthesia afterward; RWD Life Science, Shenzhen, China, catalog #:  
61 R510-22-16). A midline incision was made at the neck region and the left carotid artery, external  
62 carotid artery and internal carotid artery were isolated. The focal ischemia was induced as our  
63 described previously<sup>1</sup> using a filament made of nylon string coated with silicon  
64 (MSMC23B104PK100, RWD Life Science, Shenzhen, China) which was inserted into the middle  
65 cerebral artery (MCA) for 40 minutes, then the silicone tip was removed for reperfusion. Cerebral  
66 blood flow was monitored using a Laser Speckle Contrast Imaging (PeriCam PSI System, Perimed  
67 AB, Stockholm, Sweden) according to the manufacturer's instructions to confirm successful  
68 MCAO and MCAO/R. Mice were immediately put into a 37 °C chamber for 15 minutes and then  
69 back to a normal cages.

70

#### 71 ***In vivo* cellular uptake of PLGA–PAMAM@ CircOGDH siRNA nanoparticles**

72 Three days after tail intravenously injection of CY3 labeled PLGA–PAMAM@ CircOGDH  
73 siRNA nanoparticles in MCAO-reperfusion mice, mice were fixed by heart perfusion with cool  
74 physiological saline solution, followed by 30 ml of 4% paraformaldehyde (Biosharp, Hefei, China,  
75 catalog #BL539A). Then brains were collected for preparing tissue sections. Before being  
76 embedded with in optimal cutting temperature (OCT) compound, brain tissues were orderly  
77 immersed in 20%, 30% sucrose-distilled water overnight at 4 °C. Finally, brain sections were cut  
78 into 10 µm slices using a cryostat (Thermo Fisher Scientific, Waltham, MA, USA). The brain  
79 sections were incubated with the following primary antibody: Fluorescent Nissl staining (1:200;  
80 Thermo Fisher Scientific, Waltham, MA, USA, catalog #: N21483), anti-glial fibrillary acidic  
81 protein antibody (anti-GFAP; 1:100; Cell Signaling Technology, Danvers, MA, USA, catalog #:  
82 3670S), anti-ionized calcium-binding adaptor molecule 1 antibody (Iba-1; 1:100; Abcam, catalog  
83 #: ab5076) overnight at 4 °C, followed by incubation with a mixture of fluorescent secondary  
84 antibodies for 1 h at room temperature. Then brain sections were stained with  
85 3,3-diaminobenzidin for 5 minutes at room temperature. Images were captured using a confocal  
86 microscope (Carl Zeiss LSM700, Vizna, Germany).

87

**88 In Vivo fluorescence imaging of PLGA–PAMAM in MCAO/R Mice**

89 CY5.5-NHS (Ruixi, Xian, China, catalog #R-FR-005) labeled PLGA–PAMAM nanoparticles  
90 were assembled as following: CY5.5-NHS was dissolved in DMSO, 8µL of 10 mg/mL  
91 CY5.5-NHS solution was added to a total of 1mL PLGA–PAMAM solution. Finally, it was stirred  
92 for 12h at room temperature. The CY5.5-labeled PLGA–PAMAM nanoparticles were collected by  
93 centrifugation. 100 µL CY5.5-labeled PLGA–PAMAM nanoparticles were tail intravenously  
94 injected into MCAO/R mice. Fluorescence was monitored using the In Vivo animal imaging  
95 system (NightOWL II LB 983) at 0.5, 1.5, 2.5 h and day 3.

96

**97 Mice behavioral tests**

98 Mice were coded and were randomly divided into three groups: SHAM, MCAO/R + PLGA–  
99 PAMAM, MCAO/R + PLGA–PAMAM@ CircOGDH siRNA. Mice behavioral tests were  
100 performed by an independent investigator who was blind to the experimental groups and the data  
101 was analyzed by separate investigator.

102

103 For the grid-walking task, an elevated grid area of 32 cm × 20 cm × 50 cm (length × width ×  
104 height) made of 12 mm square wire mesh was used. Mice were placed individually on the wire  
105 grid and allowed to freely move for 3 minutes. A camera was positioned beneath the grid to record  
106 stepping errors (foot faults). The numbers of foot faults and non-faults for each limb were counted.  
107 A ratio was calculated as follows: number of foot faults / (number of foot faults + number of  
108 non-faults) × 100%.

109

110 For the cylinder test, mice were placed inside a plastic cylinder (15 cm tall with a diameter of 10  
111 cm) and videotaped for 5 minutes. The score was calculated as the ratio: (number of left hand –  
112 number of right hand) / (number of right hand + number of left hand + number of both hands).

113

114 For the adhesive removal somatosensory test, 2 small pieces of adhesive-backed paper dots of  
115 equal size (25 mm<sup>2</sup>) were used as bilateral tactile stimuli occupying the distal-radial region on the  
116 wrist of each forelimb. The time for mice to remove each stimulus from the forelimb was recorded  
117 and the time exceeded 120 s were recorded as 120 s. Before surgery, animals were trained for 3  
118 days. Once mice were able to remove the dots within 10 s, they were subjected to ischemic stroke.

119

**120 MRI for mice**

121 MRI for mice was conducted using a 9.4 tesla small animal MRI scanner (Bruker PharmaScan).  
122 Mice were anesthetized using 2% isoflurane through a nose cone, and the body temperature and  
123 respiratory rate were monitored. T2 MRI imaging was conducted at day3 after MCAO/R using a  
124 2D fast-spin echo sequence. (T2 MRI: 2D fast-spin echo sequence (3500/33 ms of repetition  
125 time/echo time, 2 average). 17 axial slices with a slice thickness of 0.7 mm, a matrix of 256 × 256,  
126 and an FOV of 20 × 20 mm). It was positioned over the brain, excluding the olfactory bulb. Under  
127 the same scale and brain slices of MCAO mouse images, T2 MRI imaging was scanned and  
128 quantified using RadiAnt DICOM Viewer software (<https://radiantviewer.com/trial>).

129

**130 Nissl staining**

131 As described above<sup>1</sup>, three days after tail intravenously injection of nanoparticles in

132 MCAO-reperfusion mice, mice were fixed by heart perfusion and finally, brain sections were cut  
133 into 10  $\mu\text{m}$  slices using a cryostat (Thermo Fisher Scientific, Waltham, MA, USA). Nissl staining  
134 experiment was performed using the Nissl staining assay kit (Beyotime Biotechnology, Shanghai,  
135 China, catalog # C0117) following the manufacturer's instructions<sup>37</sup> or Fluorescent Nissl dye  
136 (1:200; Thermo Fisher Scientific, Waltham, MA, USA, catalog # N21483). Brain slices were  
137 sealed with neutral gum and images were captured using light microscope (Leica  
138 DMILLED/ICC50HD, Solms, Germany). Quantification was performed using image J software  
139 (Bethesda, MD, USA). Researchers were blinded to the experimental conditions for data analysis.

140

#### 141 **Tunel staining**

142 As described above<sup>1</sup>, three days after tail intravenously injection of nanoparticles in  
143 MCAO-reperfusion mice, mice were fixed by heart perfusion and brain sections were cut into 10  
144  $\mu\text{m}$  slices using a cryostat (Thermo Fisher Scientific, Waltham, MA, USA). A one-step TUNEL  
145 apoptosis assay kit (Beyotime, Beijing, China, CATALOG#: C1089) was used to detect apoptosis  
146 according to the manufacturer's instructions. Brain slices were washed in PBS and subsequently  
147 incubated with 0.1% Triton X-100 in PBS for 2 min at room temperature. After washed in PBS for  
148 three times, brain slices were then incubated in TUNEL solution in the dark for 1 h at room  
149 temperature. Finally, sections were stained with Fluorescent Nissl dye (1:200; Thermo Fisher  
150 Scientific, Waltham, MA, USA, catalog # N21483) and DAPI (Beyotime, Beijing, China,  
151 CATALOG#: C1005). Images were captured using light microscope (Leica DMILLED/ICC50HD,  
152 Solms, Germany). Quantification was performed using image J software (Bethesda, MD, USA).

153

#### 154 **RNA extraction and RT-qPCR**

155 Brain tissue was collected into a tube on the ice for RNA extraction using Trizol Reagent  
156 according to the manufacturer's instructions. For RT-qPCR, RNA was performed  
157 reverse-transcription with corresponding primers for  $\beta$ -actin (Forward:  
158 ACGGCCAGGTCATCACTATTG, Reverse: CAAGAAGGAAGGCTGGAAAAGA), CircOGDH  
159 (Forward: AACTCGTGGAGGACCACTTG, Reverse: GAGCTTCGACTCAGGGAAAG) (Gene  
160 Pharma, Shanghai, China) using the Prime Script RT Master Mix (Takara, Japan, catalog  
161 #:RR047A) following the manufacturer's protocol. Real-time PCR was conducted using  
162 LightCycler® 480 SYBR Green I Master (Roche, United States, catalog #:04887352001)  
163 following the manufacturer's instructions. Thermocycle conditions used in amplification: Pre  
164 incubation at 95 °C for 10 min, amplification using 40 cycles of 95 °C for 10 sec, 55-60°C for  
165 20sec, and 72 °C for 30 sec, followed by 75 °C to 94 °C with increment of 0.5 for 5 sec, finally at  
166 40°C for 10 sec. The comparative CT method referred to as the  $2^{-\Delta\Delta\text{CT}}$  method<sup>2</sup>, a widely used  
167 method. Relative gene expression in each group were normalized by internal control and then  
168 compared with that in corresponding control.

169

#### 170 **Primary neuron culture**

171 Primary cortical neurons were obtained from the cerebral cortex of BALB/c mouse embryos  
172 (E18-E19) purchased from the Institute of Laboratory Animal Science of the Chinese Academy of  
173 Medical Sciences (Guangzhou, China). As described above<sup>1</sup>, the cerebral cortex was isolated and  
174 gently pipetted and then the cell suspension was collected in a new centrifuge tube. Cells were  
175 digested in 0.125% trypsin for 15 minutes at 37 °C and after filtered with a 70  $\mu\text{m}$  cell strainers

176 (Corning, New York, USA, catalog #:352350). Filtrates were collected and then centrifuged at  
177 1000 rpm for 5 minutes. Cells were resuspended in DMEM/F-12 containing 10% FBS (Gibco,  
178 United States, catalog #: C11330500) and 1% penicillin-streptomycin (Biological Industries,  
179 Kibbutz Beit-Haemek, Israel, catalog #: 03-031-1B), and then seeded on 6-well plates pre-coated  
180 with poly-L-lysine (Sigma-Aldrich, St. Louis, USA, catalog #: P1274). Cells were cultured for 4  
181 hours in a humidified incubator (37 °C, 5% CO<sub>2</sub>), and then medium was changed with complete  
182 medium which contained neurobasal medium (Gibco, Waltham, MA, USA) supplemented with  
183 B-27™ Supplement (Gibco, Waltham, MA, USA, catalog #: 17504-044) and 1%  
184 penicillin-streptomycin liquid. Medium was changed by half every three days. Neurons cultured  
185 after day 5 were used for experiments.

186 For ischemic treatments, neurons were mainly divided into two groups: (1) control (CON):  
187 neurons were incubated in neuronal complete medium in a regular humidified incubator (37°C, 5%  
188 CO<sub>2</sub>). (2) OGD/R: neurons were exposed to DMEM solution without glucose in an incubator  
189 containing 0 % O<sub>2</sub>, 5 % CO<sub>2</sub> with balanced N<sub>2</sub> for 3 hours, followed by reperfusion for 24 hours.  
190 SH-SY5Y cells were obtained from American Type Culture Collection and cultured in DMEM  
191 containing 10% FBS in a humidified incubator (37 °C, 5% CO<sub>2</sub>).

192

#### 193 ***In vitro* neuron uptake of PLGA–PAMAM@ CircOGDH siRNA nanoparticles**

194 Cy3 labeled PLGA–PAMAM@ CircOGDH siRNA nanoparticles were added into primary cortical  
195 neurons at day 5 for 24h, primary cortical neurons were cultured in confocal petri dishes, rinsed  
196 with PBS and fixed with 4% PFA for 15 min at room temperature. Cells were then washed in PBS  
197 twice and permeabilized with PBS containing 0.3% Triton X-100 for 20 min and blocked with 5%  
198 bovine serum albumin (BSA) for 60 min at room temperature. Cells were stained with fluorescent  
199 Nissl dye (1:200; Thermo Fisher Scientific, Waltham, MA, USA, catalog #: N21480) for 20  
200 minutes at room temperature, followed by 3,3-diaminobenzidin for 5 minutes. After PBS washing  
201 for three times, cells were mounted and images were captured using a confocal microscope (Carl  
202 Zeiss LSM700, Vizna, Germany).

203

#### 204 **CCK8 assay**

205 Cell viability was assessed by the Cell Counting Kit 8 (CCK8, Beyotime Biotechnology, Shanghai,  
206 China, catalog #: C0039) according to manufacturer's instruction. Neurons were seeded at  $2 \times 10^4$   
207 cells per well on 96-well plates and the OD450 was measured using a microplate reader (Thermo  
208 Fisher Scientific, Waltham, MA, USA). Data were normalized and calculated by the  
209 corresponding control group.

210

#### 211 **Cellular fluorescence localization of PLGA–PAMAM@ CircOGDH siRNA nanoparticles**

212 Intracellular localization of cy3 labeled PLGA–PAMAM@ CircOGDH siRNA was detected by  
213 fluorescence microscopy. Primary cortical neurons were cultured in confocal petri dishes for 5-6  
214 days, and then incubated with 2.5µL 100 µg/mL of cy3 labeled PLGA–PAMAM@ CircOGDH  
215 siRNA for various times including 3h, 6h, 9h, 12h and 24h. Cells were rinsed with PBS twice and  
216 incubated with lysotracker (Life technologies, Waltham, MA, USA, catalog #L12492) for 1h in a  
217 humidified incubator (37 °C, 5% CO<sub>2</sub>), then fixed with 4% PFA for 15 min at room temperature.  
218 Cells were stained with fluorescent Nissl dye (1:200; Thermo Fisher Scientific, Waltham, MA,  
219 USA, catalog #: N21480) for 20 minutes at room temperature, followed by 3,3-diaminobenzidin

220 for 5 minutes. After PBS washing for three times, cells were mounted and images were captured  
221 using a confocal microscope (Carl Zeiss LSM700, Vitzna, Germany).

222

### 223 **Flow cytometry in SH-SY5Y cells**

224 SH-SY5Y cells were seeded at  $18 \times 10^4$  cells per well on 6-well plate and PLGA–  
225 PAMAM@cy3-CircOGDH siRNA, cy3-CircOGDH siRNA were added for 48 hours. After  
226 washed with cold PBS three times, SH-SY5Y cells were collected in 300 ul of PBS and used for  
227 flow cytometry (Canto, BD, USA).

228

### 229 **Western blot analysis**

230 Protein extracts obtained from neurons were subjected to SDS polyacrylamide gels (12%)  
231 electrophoresis and electrically transferred to a polyvinylidene difluoride membrane before  
232 incubated with specific antibodies. Primary antibodies against the following proteins were used:  
233 COL4A4 (1:1000; Proteintech), BCL-2 (catalog #: 15071S),  $\beta$ -actin (catalog #: 4970S), BAX  
234 (catalog #: 5023S), cleaved caspase 3 (catalog #: 9664S) (1:1000; Cell Signaling Technology).  
235 After incubation with primary antibodies overnight at 4 °C, membranes were incubated for 1 hour  
236 with the appropriate secondary antibody (anti- Rabbit IgG H&L (HRP), catalog #: ab97051). The  
237 antibodies were visualized by enhanced chemiluminescence (ECL Plus; Wanleibio, Shenyang,  
238 China, catalog #: WLA006c). Image J software was used to quantify the band intensity, each value  
239 was normalized by  $\beta$ -actin. Then the ratio of COL4A4, BCL2/BAX and cleaved caspase3 in each  
240 group were compared with that in control group.

241

### 242 **Toxicity tests of PLGA–PAMAM@ CircOGDH siRNA nanoparticles *in Vivo***

243 The MCAO-reperfusion mice were treated with 100 $\mu$ L 100  $\mu$ g/mL PLGA–PAMAM@ CircOGDH  
244 siRNA nanoparticles. After treatment for 3 days, whole blood was collected and centrifuged to  
245 obtain serum for detection of RBC, WBC, PLT numbers. Hematology analysis was used to  
246 evaluate the toxicity of PLGA–PAMAM and PLGA–PAMAM@ CircOGDH siRNA nanoparticles  
247 *in vivo*, including effects on alanine aminotransferase (ALT), aspartate transaminase (AST) and  
248 creatinine (CREA), correspondingly, liver and kidney tissues were collected for H&E staining and  
249 pathological analysis.

250

### 251 **Statistics**

252 All statistical analyses were performed using SPSS (Windows version 27.0; SPSS Inc., Chicago,  
253 IL, USA) or GraphPad Prism 8.01 software (GraphPad Software, Inc., La Jolla, CA, USA). Data  
254 were expressed as mean  $\pm$ SD. For experiments with small sample size ( $n < 6$ ), power calculations  
255 were not performed and p-values were determined by non-parametric analysis (Mann-Whitney  
256 test). Otherwise, Shapiro-Wilk test was used for normality test with a threshold of 0.05, for data  
257 with normal distribution, Student's t-tests (two-tailed) or one-way ANOVA were determined, and  
258 for data without normal distribution, Mann-Whitney test was used. P-values of 0.05 or less were  
259 considered statistically significant. All representative images were selected without bias, and had  
260 characteristics typical of the data or overall trend.

261 **Supplementary Figure**

Supplement Figure 1

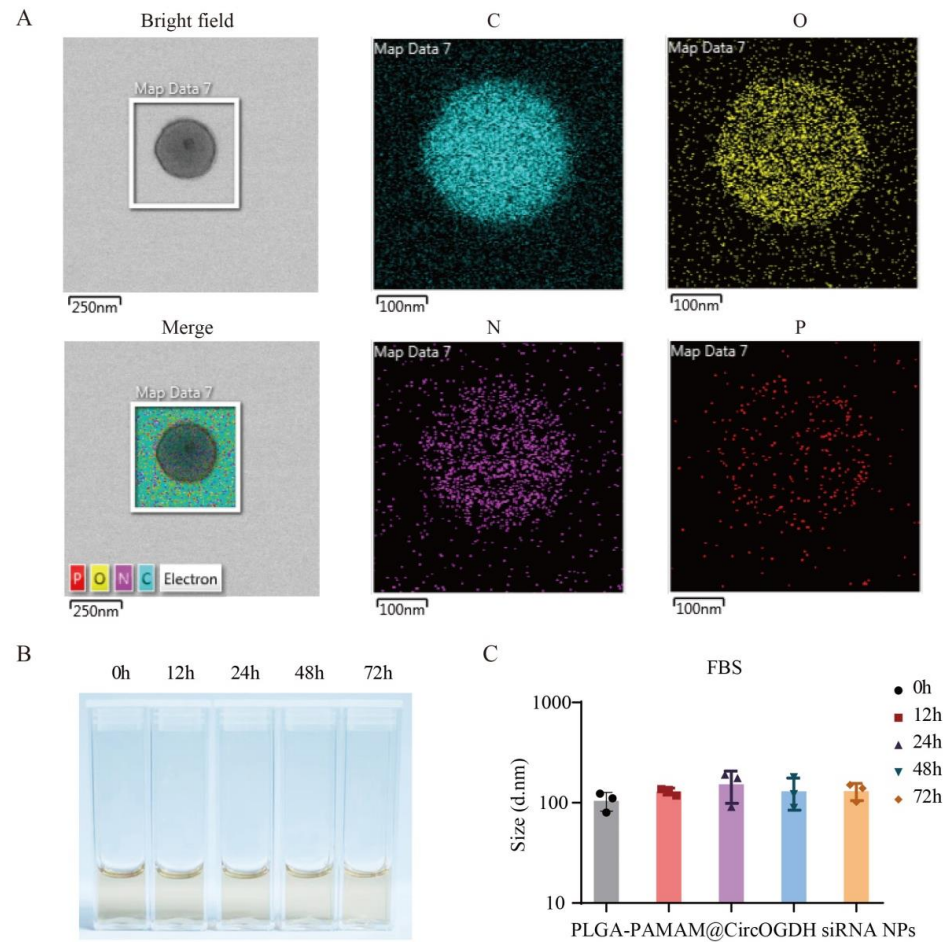

262

263 **Supplementary Figure 1. Characterization of PLGA-PAMAM@CircOGDH siRNA**264 **nanoparticles.** (A). Elemental mapping of PLGA-PAMAM@CircOGDH siRNA nanoparticles.

265 Scale bar = 100 nm. (B-C). Stability of PLGA-PAMAM@CircOGDH siRNA nanoparticles in

266 FBS solution at different time points. Data are presented as means  $\pm$  SD; n = 3.

267

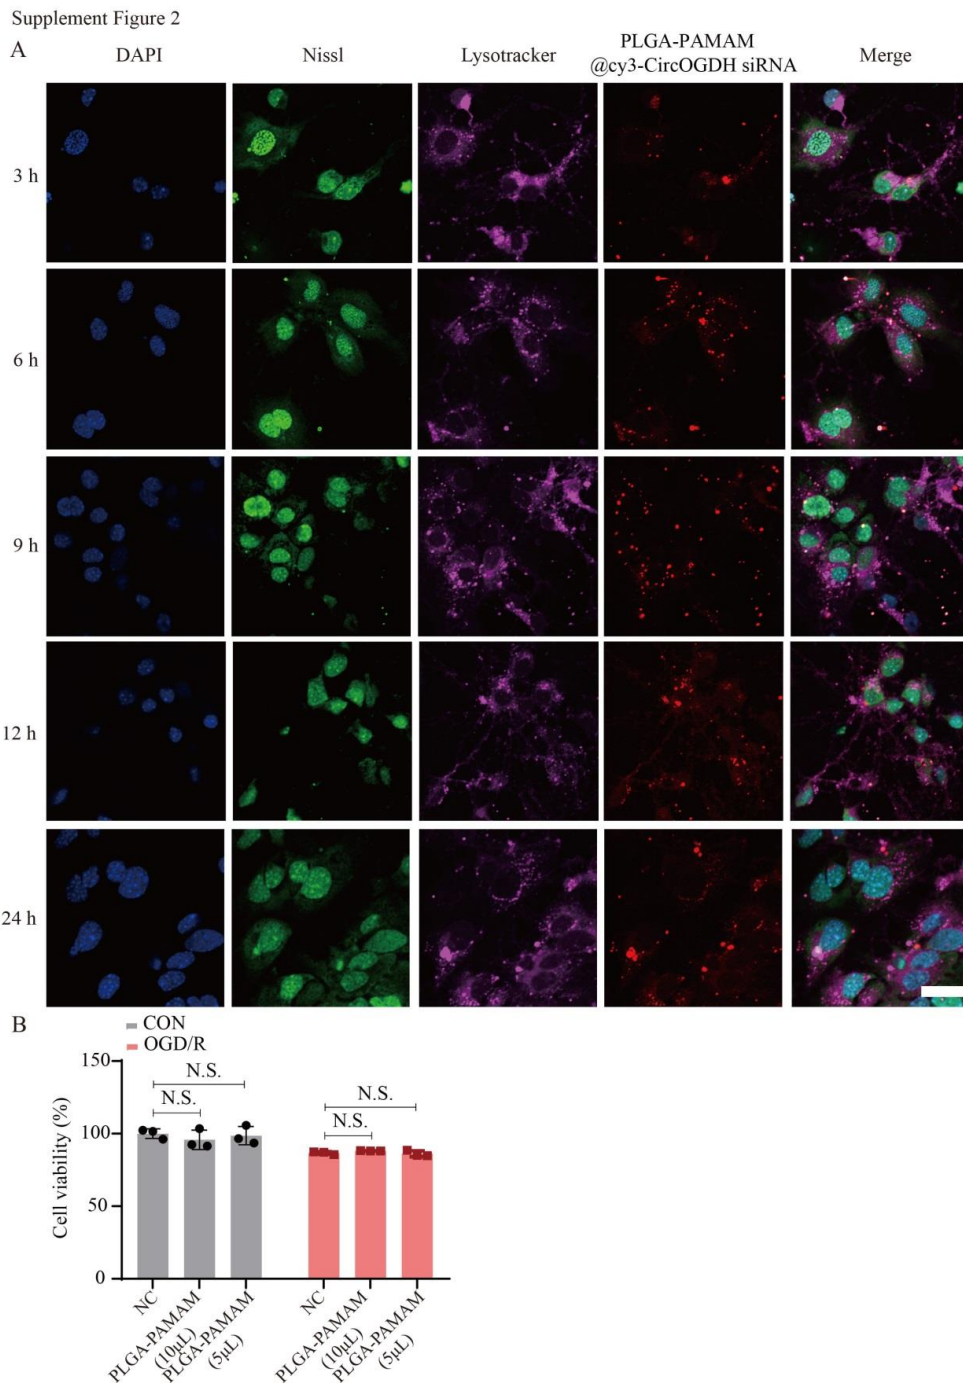

268

269

270

271

272

273

274

**Supplementary Figure 2.** Cellular uptake of PLGA–PAMAM@CircOGDH siRNA nanoparticles in primary cortical neurons. **(A)** Intracellular trafficking of PLGA–PAMAM@Cy3-CircOGDH siRNA nanoparticles (red) in primary neurons at 3 h, 6 h, 9 h, 12 h, and 24 h. Neurons were stained with Nissl (green). Lysotracker staining is shown in cherry. Nuclei were stained with DAPI (blue). Scale bar = 50 µm. **(B)** Cell viability was determined in primary cortical neurons treated with normal control (NC) and PLGA–PAMAM nanoparticles. Data were presented as mean± SD;



275 n=3, Mann–Whitney U test.  
276

Supplement Figure 3

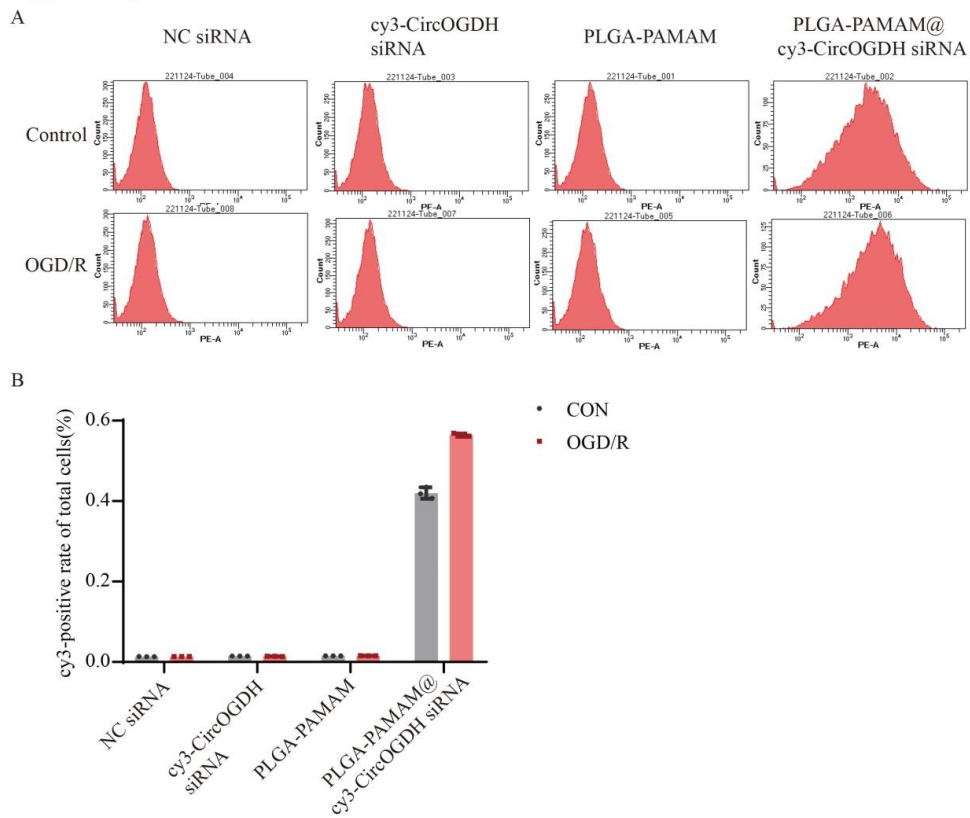

277

278 **Supplementary Figure 3. Cellular uptake of PLGA-PAMAM@CircOGDH siRNA**279 **nanoparticles in SH-SY5Y cells. (A-B).** Detection of the cy3-positive cells percentage in four

280 groups by flow cytometry analysis. Data were presented as mean± SD; n=3.

281

Supplement Figure 4

A

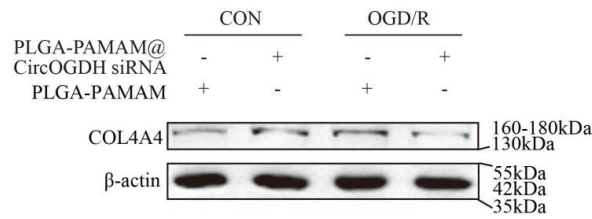

B

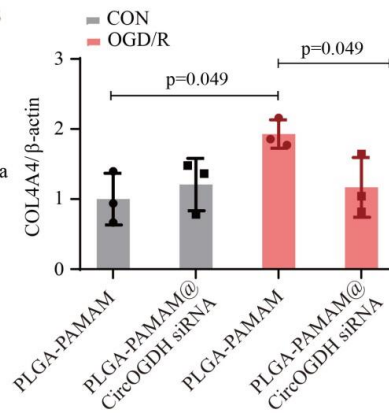

282

283 **Supplementary Figure 4. PLGA-PAMAM@CircOGDH siRNA nanoparticles downregulated**  
 284 **COL4A4 protein expression level. (A-B).** Western blot analysis of COL4A4 expression level in  
 285 control (CON) and ischemic-reperfusion (OGD/R) neurons treated with PLGA-PAMAM and  
 286 PLGA-PAMAM@CircOGDH siRNA nanoparticles. Data were presented as mean± SD; n=3,  
 287 Mann-Whitney U test.

288

Supplement Figure 5

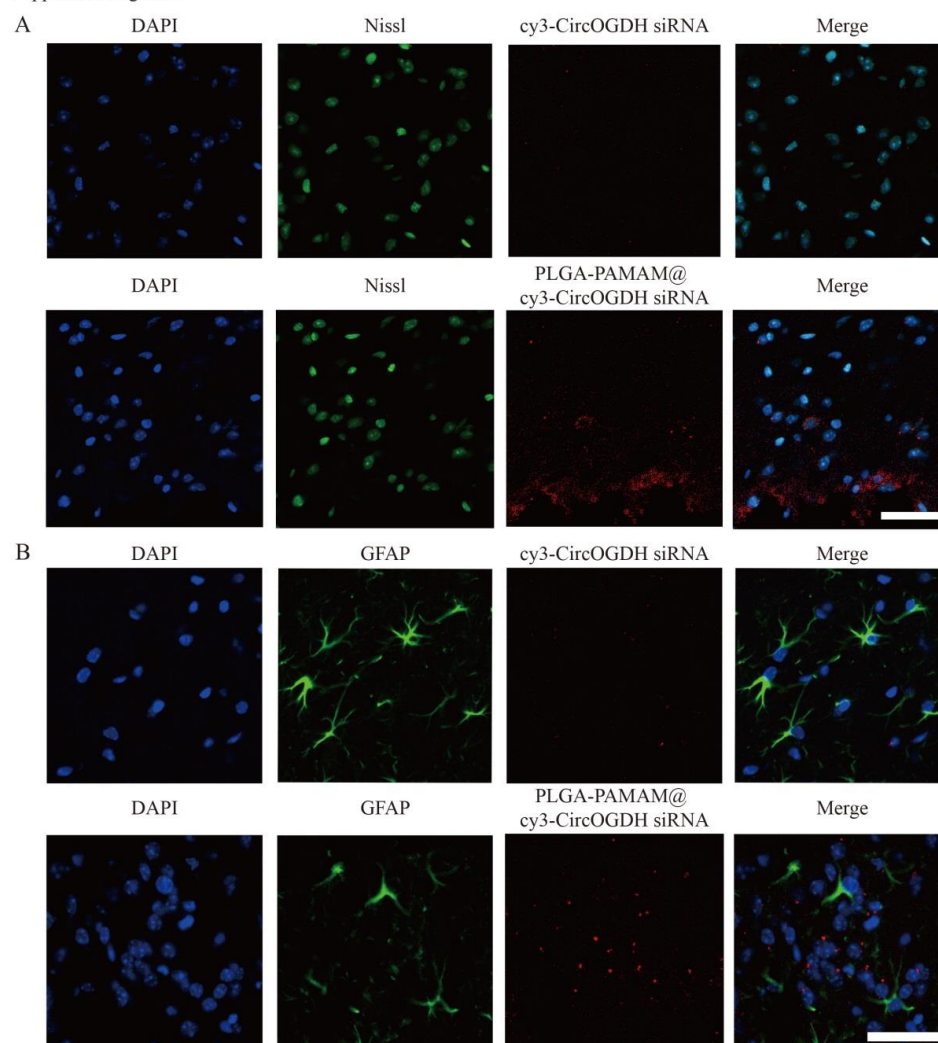

289

290 **Supplementary Figure 5. Uptake of PLGA–PAMAM@CircOGDH siRNA nanoparticles in**291 **penumbra tissue cells of mice brain. (A).** Immunofluorescence experiments showed the

292 localization of PLGA–PAMAM@cy3-CircOGDH siRNA nanoparticles (red) with Nissl staining

293 (green) in the penumbra tissue of mice brain. Nuclei were stained with DAPI. Scale bar, 50 μm.

294 **(B).** Immunofluorescence experiments showed the localization of PLGA–

295 PAMAM@cy3-CircOGDH siRNA nanoparticles (red) with GFAP staining (green) in the

296 penumbra tissue of mice brain. Nuclei were stained with DAPI. Scale bar, 50 μm.

297

Supplement Figure 6

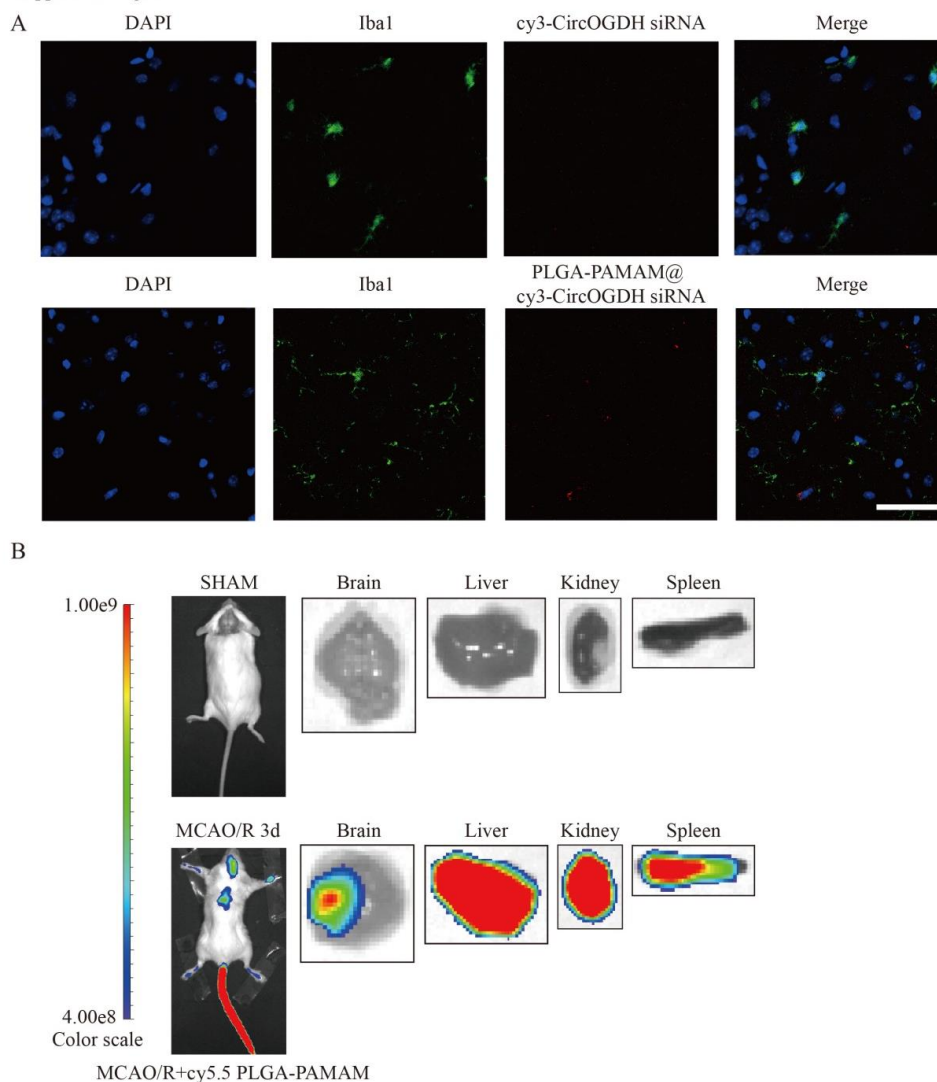

298

299

300

301

302

303

304

305

**Supplementary Figure 6. Uptake of PLGA–PAMAM@CircOGDH siRNA nanoparticles in mice.** (A). Immunofluorescence experiments showed the localization of PLGA–PAMAM@cy3–CircOGDH siRNA nanoparticles (red) with Iba1 staining (green) in the penumbra tissue of mice brain. Nuclei were stained with DAPI. Scale bar, 50  $\mu$ m. (B). *In vivo* fluorescence Imaging of Cy5.5-labelled PLGA–PAMAM nanoparticles in MCAO/R mice at day 3. Units of the color scale: perfusion units (PUs).

Supplement Figure 7

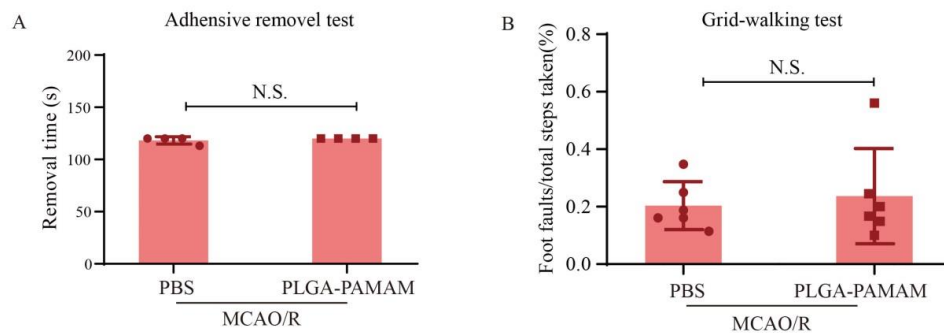

306

307 **Supplementary Figure 7. PLGA-PAMAM nanoparticles showed no effect in MCAO/R mice.**

308 (A-B). PLGA-PAMAM nanoparticles showed no effect in MCAO/R mice 3 days after tail

309 injection, as demonstrated by the adhesive removal test (A), grid-walking test (B). Data are

310 presented as means  $\pm$  SD. Adhesive removal test: n = 3-4 in each group; grid-walking test: n = 4 in

311 the SHAM group, n = 6 in the MCAO/R+PLGA-PAMAM group, Mann-Whitney U test.

312

Supplement Figure 8

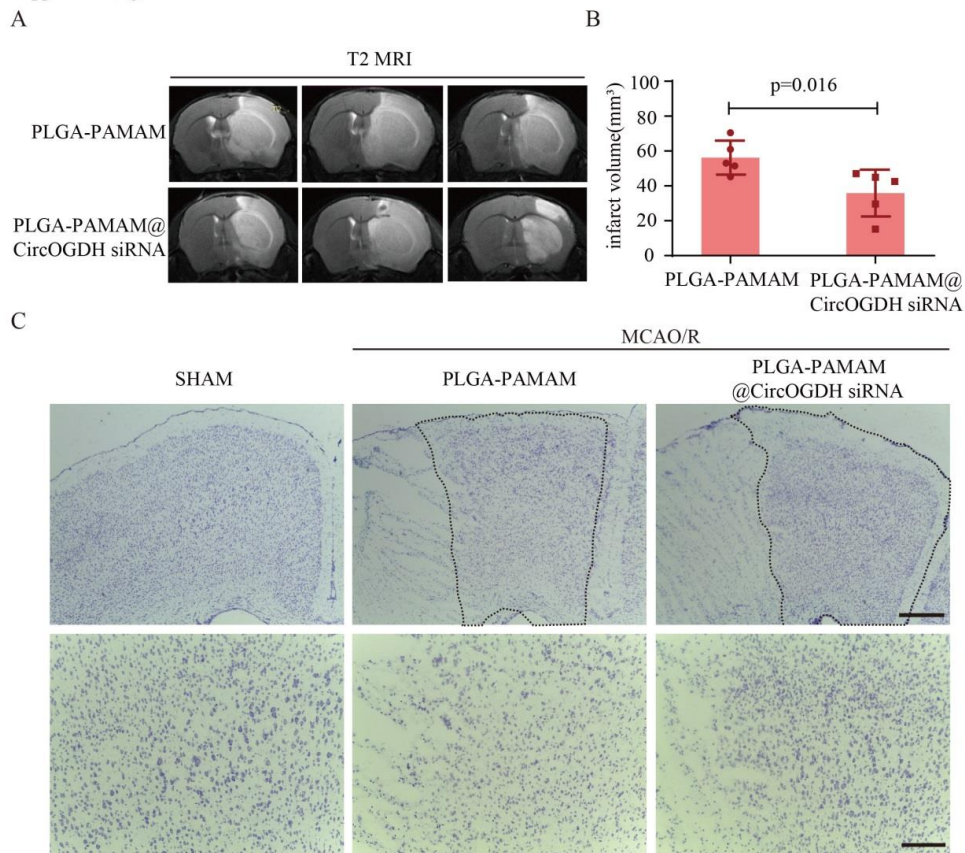

313

314 **Supplementary Figure 8. (A–B)** Representative images showing T2 MRI in MCAO/R mice after  
 315 microinjected with PLGA–PAMAM and PLGA–PAMAM@ CircOGDH siRNA nanoparticles for  
 316 three days. Data were presented as mean±SD; n=5 for each group, Mann–Whitney U test. **(C)**  
 317 PLGA–PAMAM@CircOGDH siRNA increased intact neuron number in MCAO/R mice. Nissl  
 318 staining showing the number of neurons in the SHAM, MCAO+PLGA–PAMAM, and  
 319 MCAO+PLGA–PAMAM@CircOGDH siRNA groups 3 days after tail injection. Scale bar = 500  
 320 μm (upper); scale bar = 200 μm (lower).

321

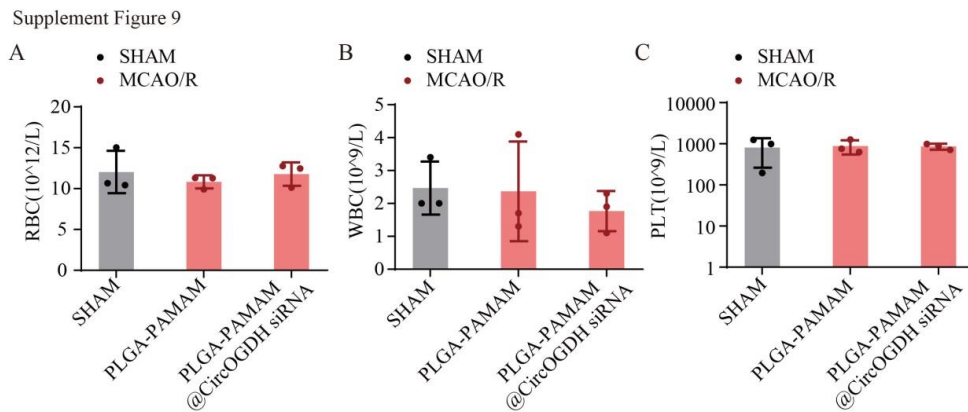

322

323 **Supplementary Figure 9.** PLGA–PAMAM@CircOGDH siRNA increased intact neuron number  
 324 in MCAO/R mice. (A–C). Hematological analyses of RBC numbers (A), WBC numbers (B), and  
 325 PLT numbers (C) were performed in the SHAM, MCAO+PLGA–PAMAM, and MCAO+PLGA–  
 326 PAMAM@CircOGDH siRNA groups 3 days after tail injection. Data were presented as mean±  
 327 SD; n=3, Mann–Whitney U test.

328

329



330 **References**

- 331 1. Liu Y, Li Y, Zang J, Zhang T, Li Y, Tan Z, Ma D, Zhang T, Wang S, Zhang Y, Huang L,  
332 Wu Y, Su X, Weng Z, Deng D, Kwan Tsang C, Xu A, Lu D. Circogdh is a penumbra  
333 biomarker and therapeutic target in acute ischemic stroke. *Circulation research*.  
334 2022:CIRCRESAHA121319412
- 335 2. Schmittgen TD, Livak KJ. Analyzing real-time pcr data by the comparative c-t method.  
336 *Nat Protoc*. 2008;3:1101-1108
- 337
