# Supplementary figures and images for: Penumbra-targeted CircOGDH siRNA-loaded nanoparticles alleviate neuronal apoptosis in focal brain ischaemia
Source: HighWire-hosted journal article supplement (doi:10.1136/svn-2022-002009), 2023-06-16

Graphical Abstract

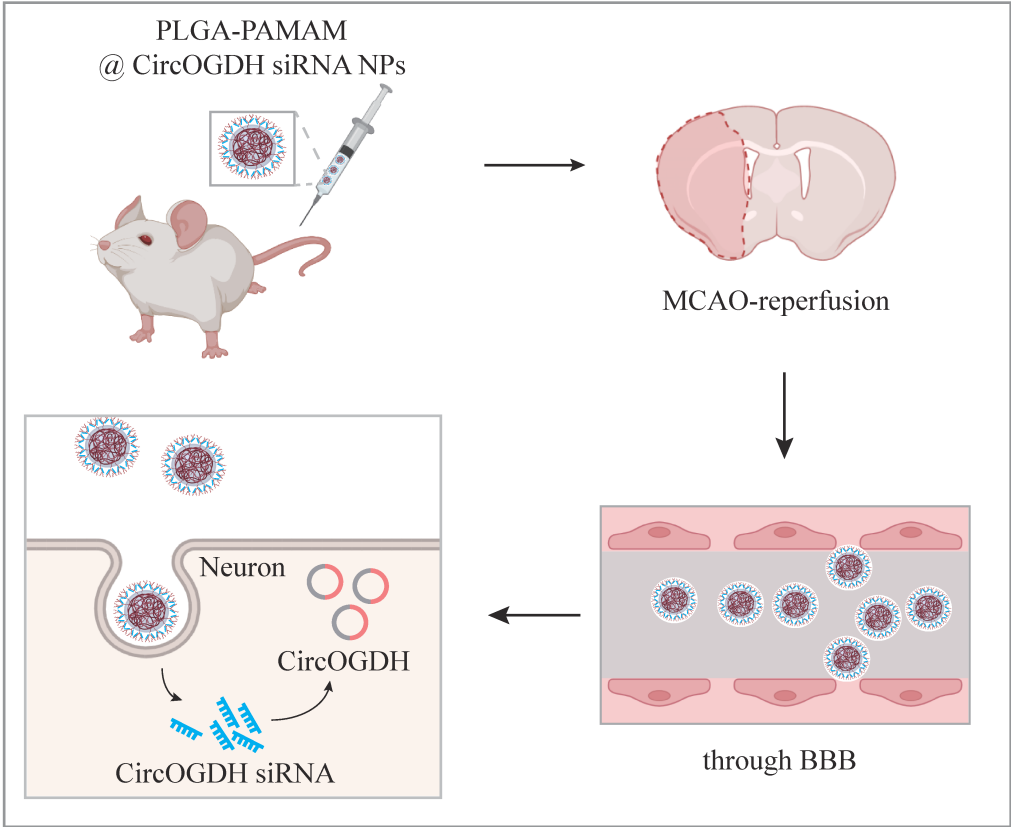

Supplement: svn-2022-002009supp002_data_supplement.pdf [file svn-2022-002009supp002_data_supplement.pdf]
